# Supplementary material for: A Systematic Investigation on Complement Pathway Activation in Diabetic Retinopathy
Source: PubMed Central journal article supplement (PMC7026189; doi:10.3389/fimmu.2020.00154), 2020-02-11
Supplement: Data_Sheet_1.pdf [file Data_Sheet_1.pdf]

## Supplementary Materials

**Supplementary Table S1:** Details of antibodies used for western blotting and their dilutions.

| Antibody list                                  | Conc. of protein used | Dilution | % of gel and condition used           |
|------------------------------------------------|-----------------------|----------|---------------------------------------|
| Ms C3, Santacruz-sc-28294                      | 15 µg                 | 1:300    | 7.5% SDS PAGE, non-reducing condition |
| Ms C1q, Abcam-ab71089                          | 30µg                  | 1:1000   | 12% SDS PGAE, reducing condition      |
| Ms C4b, Santa Cruz, sc-74524                   | 25µg                  | 1:200    | 10%SDS PAGE, non-reducing condition   |
| Rb CFB, Abcam, ab72658                         | 25µg                  | 1:500    | 10%SDS PAGE, non-reducing condition   |
| Ms CFH, Santacruz, sc-166613                   | 30 µg                 | 1:200    | 7.5%SDS PAGE, reducing condition      |
| Anti -Ms. 680RD, Licor-catalogue no. 926-68070 | -                     | 1:75,00  | -                                     |
| Anti -Rb 800CW, Licor, catalogue no.926-32211  | --                    | 1:10,000 | --                                    |

**Supplementary Table S2:** Primer sequence and TaqMan assays used for qRT PCR

| Gene            | Forward primer         | Reverse primer         | Ref.                         |
|-----------------|------------------------|------------------------|------------------------------|
| <i>CXCR4</i>    | AGCATGACGGACAAGTACAGG  | GATGAAGTCGGGAATAGTCAGC | (Vaday et al., 2004)         |
| <i>Vegf 165</i> | ATCTTCAAGCCATCCTGTGTGC | CAAGGCCACAGGGATTTTC    | (Medford et al., 2009)       |
| <i>CFH</i>      | TACTGGCTGGATACCTGCTC   | CCTGACGGAGTCTCAAATG    | (Zhang et al., 2015)         |
| <i>β Actin</i>  | TCTACAATGAGCTGCGTGTG   | GGTGAGGATCTTCATGAGGT   | (Horvatinovich et al., 1994) |

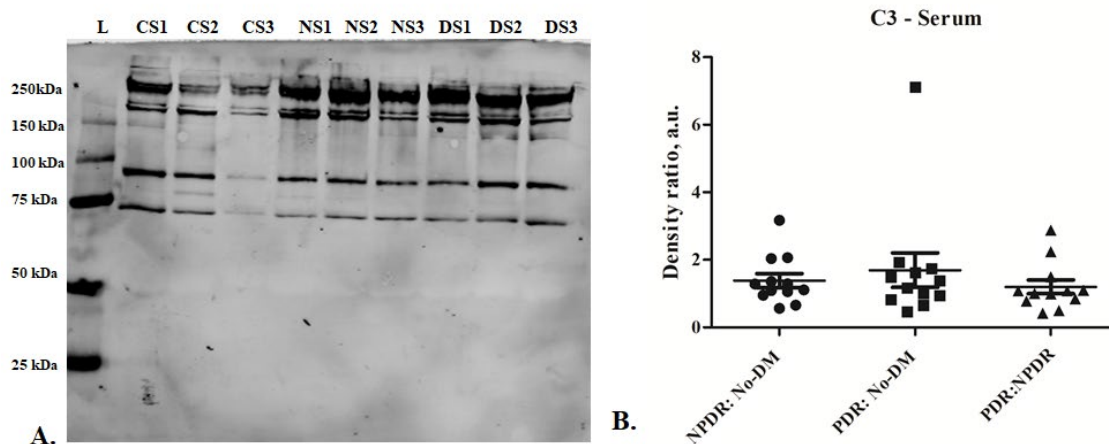

**Supplementary Figure 1.** (A) Representative Western blot of C3 in serum of PDR, NPDR, and No-DM controls. (B) Quantification of C3 in PDR vs. no-DM (n=12) and no-DM control (n=12); data represented as mean  $\pm$  SEM. DS: PDR serum, NS: NPDR serum, CS: control serum, L: protein ladder, n.s.: not significant.

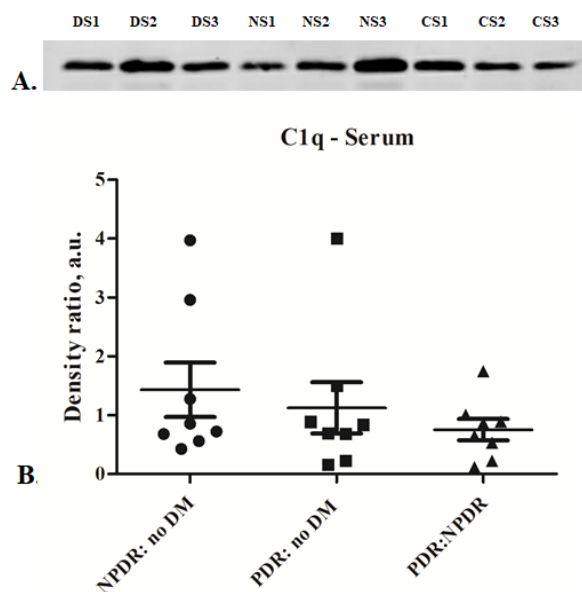

**Supplementary Figure 2.** (A) Representative Western blot of C1q in serum of PDR, NPDR, and No-DM controls. (B). Quantification of C1q in PDR (n=8) and no-DM control (n=8); data represented as mean  $\pm$  SEM. DS: PDR serum, NS: NPDR serum, CS: control serum, L: protein ladder, n.s.: not significant.

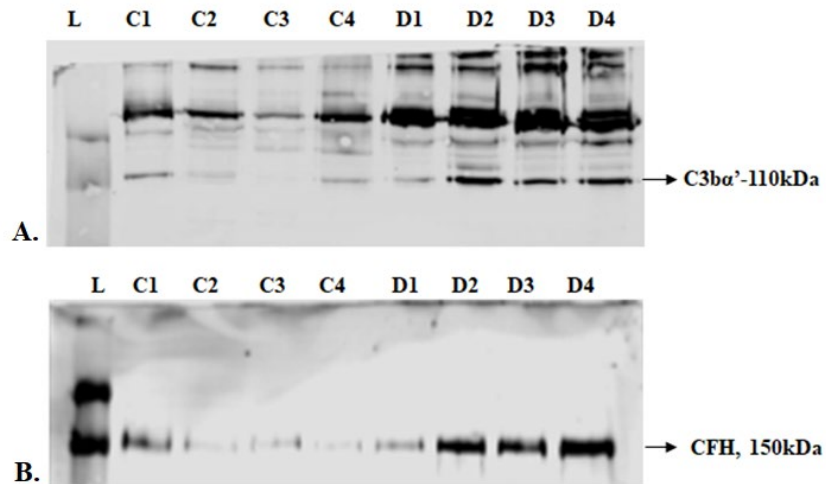

**Supplementary Figure 3.** Representative Western blot images of (A) C3 and (B) CFH in PDR and no-DM control vitreous. In the Western blots, three of four PDR vitreous samples (D2, D3, and D4) showed higher C3βα' and a concurrent increase in CFH levels.

Horvatinovich, J.M., Sparks, S.D., and Borowitz, M.J. (1994). Detection of terminal deoxynucleotidyl transferase by flow cytometry: a three color method. *Cytometry* 18(4), 228-230. doi: 10.1002/cyto.990180407.

Medford, A.R., Douglas, S.K., Godinho, S.I., Uppington, K.M., Armstrong, L., Gillespie, K.M., et al. (2009). Vascular Endothelial Growth Factor (VEGF) isoform expression and activity in human and murine lung injury. *Respir Res* 10, 27. doi: 10.1186/1465-9921-10-27.

Vaday, G.G., Hua, S.B., Peehl, D.M., Pauling, M.H., Lin, Y.H., Zhu, L., et al. (2004). CXCR4 and CXCL12 (SDF-1) in prostate cancer: inhibitory effects of human single chain Fv antibodies. *Clin Cancer Res* 10(16), 5630-5639. doi: 10.1158/1078-0432.CCR-03-0633.

Zhang, Y., Huang, Q., Tang, M., Zhang, J., and Fan, W. (2015). Complement Factor H Expressed by Retinal Pigment Epithelium Cells Can Suppress Neovascularization of Human Umbilical Vein Endothelial Cells: An in vitro Study. *PLoS One* 10(6), e0129945. doi: 10.1371/journal.pone.0129945.
